# Supplementary material for: Real-time cell metabolism assessed repeatedly on the same cells via para-hydrogen induced polarization
Source: Royal Society of Chemistry journal article supplement (doi:10.1039/d3sc01350b), 2023-01-01
Supplement: d3sc01350b1.pdf [file d3sc01350b1.pdf]

## Supporting Information

### Real-time cell metabolism assessed repeatedly on the same cells via para-hydrogen induced polarization

Yonghong Ding<sup>†[a,b]</sup>, Gabriele Stevanato<sup>†[a,b]</sup>, Frederike von-Bonin<sup>[c]</sup>, Dieter Kubel<sup>[c]</sup>, Stefan Glögger<sup>\*[a,b]</sup>

#### 1. Cell preparation

Hodgkin lymphoma derived L1236 was kindly provided by v. Diehl (Cologne/Germany) (Peripheral blood mononuclear cells of a patient with advanced Hodgkin's lymphoma give rise to permanently growing Hodgkin-Reed Sternberg cells)<sup>1,2</sup>. L1236 cells were cultured in RPMI1640 (Anprotec AC-LM-0058) supplemented with 10% Fetal calf serum (Sigma) and Glutamine (Thermo-Fisher scientific). L1236 were suspension cells grown at a cell density of  $5 \times 10^5$  cells/mL. Around 25 hrs before PHIP measurements cells were treated with 15 nM FK866 (Sigma) or corresponding amounts of DMSO (Ctrl).

Around 20-30 million cells were collected into a falcon tube and pelleted by centrifugation under  $130 \times g$  for 3 min at room temperature. The supernatant was removed and the cells were resuspended with 120  $\mu$ L fresh RPMI1640 medium. The cell slurry was then transferred into a 5 mm NMR tube via a cannula for PHIP experiments. Cell viability was performed before and after PHIP experiments via using tryphan blue staining.

Hela Kyoto wild-type cell (Hela cell) was kindly provided by Dr. Peter Lenart (Göttingen/Germany). Hela cells were adherent cells cultured in the Dulbecco's Modified Eagle Medium supplemented with 4.5 g/L D-Glucose, 2 mM glutamine, 1 mM Sodium Pyruvate, 10% (v/v) heat-inactivated fetal bovine serum, 100 U/mL Penicillin and Streptomycin (Thermo-Fisher scientific). The cells were kept at 37°C in a humidified 5% CO<sub>2</sub> atmosphere to around 70-80% confluency before collection<sup>3</sup>. Upon collection, the Hela cells were detached from cell culture flask by using trypsin/EDTA (0.05%/0.02%) and collected the same as for L1236 cells.

## 2. NMR experiments

For all of our studies we used a phenyl acetylene [1-<sup>13</sup>C] pyruvate which is synthesized as described in a previous publication<sup>4</sup> and used as a Phip-SAH precursor molecule. Experimentally, 150  $\mu$ L acetone-*d*<sub>6</sub> solution containing 55 mM precursor and 10 mM of [1,4-Bis(diphenylphosphino)butane](1,5-cyclooctadiene)rhodium(I) tetrafluoroborate catalyst is degassed by bubbling N<sub>2</sub> at ambient temperature and pressure for ~60 seconds. The experiment proceeds according to the following steps (The time required to finish each step is added at the end):

- 1) The 5 mm NMR tube containing the sample is immersed in a water bath for 90-120 seconds at ~60 °C for a better catalyst activation (t=0s).
- 2) The NMR tube is placed inside the 300 MHz spectrometer in which the probe temperature is at 37 °C (t=~5s).
- 3) Parahydrogen at 7 bars is supplied inside the NMR tube through a capillary (O.D ~0.1 mm) for 20 seconds. The MINERVA sequence transfers polarization from the parahydrogen protons to carbonyl <sup>13</sup>C carbon of the precursor molecule according to the spin dynamics model already described<sup>4,7</sup>. The parameters used for MINERVA assumed the following J-coupling network: J<sub>HH</sub>=11.60 Hz, J<sub>H1C1</sub>=0 Hz, J<sub>H2C1</sub>=11.60 Hz, J<sub>C1C2</sub>=2.68 Hz (t=~35s).
- 4) In the following 5 seconds, the pressure is released and 150  $\mu$ L of a 50 mM solution of Na<sub>2</sub>CO<sub>3</sub> in D<sub>2</sub>O are injected into the NMR tube via a plastic cannula (i.d. 1 mm) coupled externally to a 1 mL syringe. Upon injection of the aqueous solution, the drop in catalyst's solubility initiates the catalyst precipitation (t=~40s).
- 5) Following the base injection, the sample is manually transferred to the top of the 7T magnet and immersed in a falcon tube containing a warm bath of ~60 °C anchored to a magnetic plate providing a residual magnetic field of ~ 8 mT (t=~45s).
- 6) A vacuum pump connected to the NMR tube is activated for 15 seconds to evaporate the acetone (boiling point of 56 °C) from the acetone-D<sub>2</sub>O mixture present in the NMR tube (t=~60s).
- 7) The NMR tube is now opened and the hyperpolarized solution is pulled out from the NMR tube through a second 1 mL syringe and mixed with 150  $\mu$ L (2X) Phosphate buffered Saline solution to adjust the aqueous pH to ~7 (the right volume of PBS buffer to add to

achieve pH ~7 was determined using a pH meter and confirmed also by pH indicator papers using samples of cells after PHIP experiments) and obtain isotonicity (t~65s).

- 8) Finally, the solution is injected through a 1 mm glass fibre filter, via a 1 mm o.d. plastic cannula, into a second NMR tube – also anchored to the magnetic plate – containing ~200  $\mu$ L of cell solution previously prepared. The new solution containing hyperpolarized pyruvate and the cells to be examined is gently mixed for ~3 sec and the NMR tube is dropped inside the magnet (t~70s).
- 9) The carbon NMR signal is acquired via the application of consecutive 22.5 flip angle pulses every 2 seconds (t~3min).

For the second PHIP experiments on the same sample, the following steps are performed:

- 10) The cell suspension after the first PHIP experiments is palleted by using a bench-top hand-centrifuge under  $80 \times g$  for 2 min at room temperature (t~7min).
- 11) The supernatant is carefully removed without removing cells and fresh medium or medium containing 50 mM NADH is added to re-suspend the cells (t~10min).
- 12) The new cell suspension is subjected to a second PHIP experiment following the steps from 1)-9) (t=13-15min).

For SES protocol, the sample was subjected to NMR  $^{13}\text{C}$  thermal measurement after PHIP experiment to estimate the concentration of  $1\text{-}^{13}\text{C}$  lactate in the cell suspension. For DES protocol, the concentration of  $1\text{-}^{13}\text{C}$  lactate was assumed to be 0.048 mM. It takes within 15 min to finish a DES assay. The results of cell viability after the first and second PHIP experiment in a DES assay have been shown in Table 1-3.

Table 1: Cell viability of HeLa cells after the first PHIP and second PHIP experiments in a DES assay (n=3).

| n | HeLa  |        |
|---|-------|--------|
|   | first | second |
| 1 | 98%   | 97%    |
| 2 | 97%   | 95%    |
| 3 | 97%   | 97%    |

Table 2: Cell viability of L1236 cells after the first PHIP and second PHIP experiments under the condition

of DMSO and DMSO+NADH (n=3).

|   | L1236 |        |           |        |
|---|-------|--------|-----------|--------|
| n | DMSO  |        | DMSO+NADH |        |
|   | First | Second | First     | Second |
| 1 | 96%   | 95%    | 94%       | 91%    |
| 2 | 94%   | 92%    | 95%       | 93%    |
| 3 | 97%   | 93%    | 95%       | 92%    |

Table 3: Cell viability of L1236 cells after the first PHIP and second PHIP experiments under the condition of FK866 and FK866+NADH (n=3).

|   | L1236 |        |            |        |
|---|-------|--------|------------|--------|
| n | FK866 |        | FK866+NADH |        |
|   | First | Second | First      | Second |
| 1 | 92%   | 90%    | 93%        | 92%    |
| 2 | 94%   | 91%    | 95%        | 91%    |
| 3 | 95%   | 90%    | 95%        | 93%    |

### 3. Calculation of kinetic rates

The model for calculating of the conversion rate (flux,  $R$ ) of pyruvate to lactate has been described previously<sup>3</sup>.

The equation to calculate the flux  $R$  using the build-up rate  $k$  and normalizing on initial pyruvate concentration  $[Lac]$ , and number of cells ( $\#cells$ ):

$$R = \frac{k \cdot [Lac]}{\#cells}$$

These results were then further analysed for statistical significance using one-tailed student t-test.

As the pyruvate-to-lactate reaction is predominantly shifted towards lactate and in accordance

with previously reported studies, we assume an unidirectional conversion rate:

$$Pyr \xrightarrow{k_{PL}} Lac \quad (SI.1)$$

A set of two differential equations models the variation of the pyruvate and lactate signals over time:

$$\frac{dPyr}{dt} = -k_{PL} \times Pyr - \frac{Pyr}{T_1} \quad (SI.2)$$

$$\frac{dLac}{dt} = k_{PL} \times Pyr - \frac{Lac}{T_1} \quad (SI.3)$$

Following the discretized version in reference <sup>8</sup> equations SI.2 and SI.3 become:

$$\frac{\Delta L_k}{TR} = k_{PL} \times Pyr_k - R_{eff} \times Lac_k \quad (SI.4)$$

$$R_{eff} = \frac{1}{T_{1,Lac}} + \frac{1 - \cos \beta}{TR} \quad (SI.5)$$

The index  $k$  represent the  $k^{th}$  slice in the pseudo 2D experiment consisting in the repeated application of  $\square$   $^{13}C$  flip angle pulses repeated every  $TR$ . The effective decay rate  $R_{eff}$  accounts for signal decay due to Boltzmann thermalization, repetitive excitation with  $\square$  flip angle pulse (20 degree for *in-vitro* experiments). The pyruvate and lactate integral signal then results in a system of linear equations for  $k_{PL}$  and  $R_{eff}$  that can be solved by a pseudo matrix inversion:

$$\begin{pmatrix} \frac{\Delta L_1}{TR} \\ \vdots \\ \frac{\Delta L_k}{TR} \end{pmatrix} = \begin{pmatrix} Pyr_1 & -Lac_1 \\ \vdots & \vdots \\ Pyr_k & -Lac_k \end{pmatrix} \cdot \begin{pmatrix} k_{PL} \\ R_{eff} \end{pmatrix} \quad (SI.6)$$

For every slice  $k$  by the integral values  $Pyr_k$  and  $Lac_k$ . By pseudoinverting the matrix above  $k_{PL}$  and  $R_{eff}$  can be estimated.

## References:

- 1 Wolf, J. *et al.* Peripheral blood mononuclear cells of a patient with advanced Hodgkin's lymphoma give rise to permanently growing Hodgkin-Reed Sternberg cells. *Blood* **87**, 3418-3428 (1996).
- 2 Kube, D. *et al.* STAT3 is constitutively activated in Hodgkin cell lines. *Blood* **98**, 762-770, doi:10.1182/blood.v98.3.762 (2001).
- 3 Ding, Y. *et al.* Rapidly Signal-enhanced Metabolites for Atomic Scale Monitoring of Living Cells with Magnetic Resonance. *Chemistry-Methods*, e202200023, doi:https://doi.org/10.1002/cmt.202200023.
- 4 Korchak, S., Mamone, S. & Glogglger, S. Over 50 %  $(^1H)$  and  $(^{13}C)$  Polarization for Generating Hyperpolarized Metabolites-A para-Hydrogen Approach. *ChemistryOpen* **7**, 672-676, doi:10.1002/open.201800086 (2018).

- 5 Ding, Y. *et al.* Rapidly Signal-enhanced Metabolites for Atomic Scale Monitoring of Living Cells with Magnetic Resonance. *Chemistry–Methods* **n/a**, e202200023, doi:<https://doi.org/10.1002/cmt.202200023>.
- 6 Korchak, S., Yang, S., Mamone, S. & Gloggler, S. Pulsed Magnetic Resonance to Signal-Enhance Metabolites within Seconds by utilizing para-Hydrogen. *ChemistryOpen* **7**, 344-348, doi:10.1002/open.201800024 (2018).
- 7 Korchak, S., Emondts, M., Mamone, S., Blumich, B. & Gloggler, S. Production of highly concentrated and hyperpolarized metabolites within seconds in high and low magnetic fields. *Phys Chem Chem Phys* **21**, 22849-22856, doi:10.1039/c9cp05227e (2019).
- 8 Khagai, O. *et al.* Apparent rate constant mapping using hyperpolarized [1-(13)C]pyruvate. *NMR Biomed* **27**, 1256-1265, doi:10.1002/nbm.3174 (2014).
